# Supplementary material for: Measurable health effects associated with the daylight saving time shift
Source: PLoS Comput Biol. 2020 Jun 8;16(6):e1007927. doi: 10.1371/journal.pcbi.1007927 (PMC7302868; doi:10.1371/journal.pcbi.1007927)
Supplement: S19 Table — (CSV) [file pcbi.1007927.s020.csv]

	Condition	System	Relative Risk (Spring)	99.9% C.I. (Spring)	Spring Significant?	Relative Risk (Autumn)	99.9% C.I. (Autumn)	Autumn Significant?
0	On diagnostic imaging and in function studies, without diagnosis|abnormal clinical and laboratory findings, not elsewhere classified$F$61-	abnormal clinical and laboratory findings, not elsewhere classified	1.0134543466370576	{'CI': array([1.00149669, 1.02413604]), 'Gelman-Rubin': 0.9998250615109829}	Yes	0.9925013455951148	{'CI': array([0.98220524, 1.00264573]), 'Gelman-Rubin': 1.0000036670877521}	No
1	On diagnostic imaging and in function studies, without diagnosis|abnormal clinical and laboratory findings, not elsewhere classified$M$61-	abnormal clinical and laboratory findings, not elsewhere classified	1.0232620212243355	{'CI': array([1.01023088, 1.03685878]), 'Gelman-Rubin': 1.0001180432003154}	Yes	0.9918881675867492	{'CI': array([0.97913405, 1.00685275]), 'Gelman-Rubin': 0.9998308259038329}	No
2	On examination of blood, without diagnosis|abnormal clinical and laboratory findings, not elsewhere classified$M$41-60	abnormal clinical and laboratory findings, not elsewhere classified	1.0161786528208876	{'CI': array([1.0039154 , 1.02863881]), 'Gelman-Rubin': 0.9998068361604259}	Yes	0.9990990643786816	{'CI': array([0.9867027 , 1.01120037]), 'Gelman-Rubin': 0.9998098648096317}	No
3	On examination of other body fluids, substances and tissues, without diagnosis|abnormal clinical and laboratory findings, not elsewhere classified$F$11-20	abnormal clinical and laboratory findings, not elsewhere classified	1.073934621218078	{'CI': array([1.04114213, 1.10711159]), 'Gelman-Rubin': 0.9999879222527053}	Yes	0.9826958760431079	{'CI': array([0.95246581, 1.01181496]), 'Gelman-Rubin': 0.9998704018376728}	No
4	Chronic rheumatic heart diseases|diseases of the circulatory system$M$61-	diseases of the circulatory system	1.034100646065716	{'CI': array([1.00023168, 1.06911738]), 'Gelman-Rubin': 0.9998508221612563}	Yes	0.9986776015526077	{'CI': array([0.96559137, 1.03048125]), 'Gelman-Rubin': 0.9997829793409185}	No
5	Diseases of veins, lymphatic vessels and lymph nodes, not elsewhere classified|diseases of the circulatory system$M$41-60	diseases of the circulatory system	1.0207637855868066	{'CI': array([1.00499419, 1.03595054]), 'Gelman-Rubin': 1.000217199307683}	Yes	0.9966604308605114	{'CI': array([0.98318483, 1.01071317]), 'Gelman-Rubin': 0.9997852253840609}	No
6	Hypertensive diseases|diseases of the circulatory system$F$41-60	diseases of the circulatory system	1.0101089104474612	{'CI': array([1.0054064, 1.0147213]), 'Gelman-Rubin': 0.9999898852901287}	Yes	0.9897494130762154	{'CI': array([0.98502052, 0.99462158]), 'Gelman-Rubin': 0.9998177339864506}	Yes
7	Other forms of heart disease|diseases of the circulatory system$M$11-20	diseases of the circulatory system	1.0432126869154894	{'CI': array([1.00686915, 1.0799304 ]), 'Gelman-Rubin': 0.9998501658201424}	Yes	0.9961298461367518	{'CI': array([0.96329292, 1.03031111]), 'Gelman-Rubin': 0.9998189945607541}	No
8	Diseases of oral cavity, salivary glands and jaws|diseases of the digestive system$F$11-20	diseases of the digestive system	1.0419082994159132	{'CI': array([1.00755243, 1.07450129]), 'Gelman-Rubin': 0.9998947362343494}	Yes	1.0330286316665247	{'CI': array([0.99915991, 1.06427709]), 'Gelman-Rubin': 0.9997778769682335}	No
9	Disorders of gallbladder, biliary tract and pancreas|diseases of the digestive system$F$41-60	diseases of the digestive system	1.016240051643659	{'CI': array([1.00184707, 1.03059536]), 'Gelman-Rubin': 0.999760165359088}	Yes	1.0001003183562145	{'CI': array([0.98519311, 1.0148627 ]), 'Gelman-Rubin': 0.9999287381480099}	No
10	Noninfective enteritis and colitis|diseases of the digestive system$F$0-10	diseases of the digestive system	1.0281050764827402	{'CI': array([1.00904731, 1.04886997]), 'Gelman-Rubin': 0.9998122303340736}	Yes	1.0116909209216634	{'CI': array([0.99082918, 1.03548207]), 'Gelman-Rubin': 0.9998511617890247}	No
11	Noninfective enteritis and colitis|diseases of the digestive system$F$21-40	diseases of the digestive system	1.017984838285213	{'CI': array([1.00501797, 1.03238621]), 'Gelman-Rubin': 0.9999243015772589}	Yes	0.98968350838549	{'CI': array([0.97668856, 1.00422543]), 'Gelman-Rubin': 1.0002366730284287}	No
12	Noninfective enteritis and colitis|diseases of the digestive system$M$0-10	diseases of the digestive system	1.0243407098414803	{'CI': array([1.00726376, 1.04288171]), 'Gelman-Rubin': 0.9998248449548123}	Yes	1.014265132447832	{'CI': array([0.99224377, 1.03506163]), 'Gelman-Rubin': 0.9999330803166857}	No
13	Noninfective enteritis and colitis|diseases of the digestive system$M$21-40	diseases of the digestive system	1.0239245084521438	{'CI': array([1.00666575, 1.04033175]), 'Gelman-Rubin': 0.9997912795597024}	Yes	0.9796293124806223	{'CI': array([0.96354852, 0.99628646]), 'Gelman-Rubin': 0.9998425303994665}	Yes
14	Other diseases of intestines|diseases of the digestive system$F$11-20	diseases of the digestive system	1.038103717423679	{'CI': array([1.00750154, 1.06683797]), 'Gelman-Rubin': 0.9998613645526917}	Yes	1.0035206306520363	{'CI': array([0.97716582, 1.0322472 ]), 'Gelman-Rubin': 0.9997760013648019}	No
15	Diseases of external ear|diseases of the ear and mastoid process$F$61-	diseases of the ear and mastoid process	1.0278074879085302	{'CI': array([1.00613637, 1.05247606]), 'Gelman-Rubin': 0.9999039444791908}	Yes	0.981714904465816	{'CI': array([0.95848269, 1.00185318]), 'Gelman-Rubin': 0.9998530399760565}	No
16	Diseases of external ear|diseases of the ear and mastoid process$M$61-	diseases of the ear and mastoid process	1.030979236618176	{'CI': array([1.00785826, 1.05572061]), 'Gelman-Rubin': 0.9998657049461582}	Yes	0.9749990572803524	{'CI': array([0.95507849, 0.99618409]), 'Gelman-Rubin': 0.9998023258178436}	Yes
17	Diseases of middle ear and mastoid|diseases of the ear and mastoid process$F$0-10	diseases of the ear and mastoid process	1.0080490863050158	{'CI': array([1.00102138, 1.01538169]), 'Gelman-Rubin': 0.9998643113492757}	Yes	1.006933610300465	{'CI': array([0.99791982, 1.01575721]), 'Gelman-Rubin': 0.999820707644606}	No
18	Diseases of middle ear and mastoid|diseases of the ear and mastoid process$M$0-10	diseases of the ear and mastoid process	1.0105044806894223	{'CI': array([1.00369896, 1.01730438]), 'Gelman-Rubin': 0.9998528204253919}	Yes	1.0045914462015362	{'CI': array([0.99740532, 1.01256023]), 'Gelman-Rubin': 0.9997851846715804}	No
19	Other disorders of ear|diseases of the ear and mastoid process$F$61-	diseases of the ear and mastoid process	1.018522160785169	{'CI': array([1.00218299, 1.03674042]), 'Gelman-Rubin': 0.9998047584453904}	Yes	0.973785387124244	{'CI': array([0.95801118, 0.99170784]), 'Gelman-Rubin': 0.9998194807667781}	Yes
20	Disorders of eyelid, lacrimal system and orbit|diseases of the eye and adnexa$F$61-	diseases of the eye and adnexa	1.019778404044549	{'CI': array([1.00359002, 1.03610396]), 'Gelman-Rubin': 0.9999636705307398}	Yes	0.9982914333874696	{'CI': array([0.98385577, 1.01229414]), 'Gelman-Rubin': 0.999818220831118}	No
21	Disorders of lens|diseases of the eye and adnexa$F$41-60	diseases of the eye and adnexa	1.0189888885814449	{'CI': array([1.00273142, 1.03785068]), 'Gelman-Rubin': 0.9998383945733952}	Yes	1.0114833949719195	{'CI': array([0.99508161, 1.02859102]), 'Gelman-Rubin': 0.9998161295903925}	No
22	Disorders of lens|diseases of the eye and adnexa$M$61-	diseases of the eye and adnexa	1.0208730986573404	{'CI': array([1.00949791, 1.03128171]), 'Gelman-Rubin': 0.9998589100562677}	Yes	1.0070143956880726	{'CI': array([0.99731216, 1.01712742]), 'Gelman-Rubin': 1.0002045437052212}	No
23	Disorders of ocular muscles, binocular movement, accommodation and refraction|diseases of the eye and adnexa$F$0-10	diseases of the eye and adnexa	1.0281374813302837	{'CI': array([1.0026719 , 1.05597384]), 'Gelman-Rubin': 0.9998315057455651}	Yes	1.0244959268088611	{'CI': array([1.00060592, 1.05008881]), 'Gelman-Rubin': 0.9999401843143849}	Yes
24	Disorders of ocular muscles, binocular movement, accommodation and refraction|diseases of the eye and adnexa$M$0-10	diseases of the eye and adnexa	1.0270166318300449	{'CI': array([1.0018538 , 1.05437067]), 'Gelman-Rubin': 0.9997899484271059}	Yes	1.0134791966505532	{'CI': array([0.98928012, 1.04037125]), 'Gelman-Rubin': 0.9997922468992481}	No
25	Disorders of vitreous body and globe|diseases of the eye and adnexa$F$61-	diseases of the eye and adnexa	1.0328258243247352	{'CI': array([1.01241136, 1.05420311]), 'Gelman-Rubin': 0.9997839550732052}	Yes	0.9898258447793714	{'CI': array([0.97011821, 1.00910402]), 'Gelman-Rubin': 0.9998961511844767}	No
26	Glaucoma|diseases of the eye and adnexa$F$41-60	diseases of the eye and adnexa	1.0475401224664378	{'CI': array([1.03239765, 1.06299833]), 'Gelman-Rubin': 1.000034323705436}	Yes	0.9835849343678856	{'CI': array([0.96917081, 0.9974111 ]), 'Gelman-Rubin': 0.9998449808375073}	Yes
27	Glaucoma|diseases of the eye and adnexa$M$41-60	diseases of the eye and adnexa	1.0398186554475912	{'CI': array([1.02361896, 1.05751601]), 'Gelman-Rubin': 0.9998452595575624}	Yes	0.9775270400822084	{'CI': array([0.96017208, 0.99296501]), 'Gelman-Rubin': 1.0000646458111424}	Yes
28	Disorders of breast|diseases of the genitourinary system: pelvis, genitals and breasts$F$11-20	diseases of the genitourinary system: pelvis, genitals and breasts	1.05348567201889	{'CI': array([1.01613744, 1.09227158]), 'Gelman-Rubin': 0.9998735134312854}	Yes	0.9852142950027692	{'CI': array([0.95105826, 1.01966175]), 'Gelman-Rubin': 0.9998668875532285}	No
29	Noninflammatory disorders of female genital tract|diseases of the genitourinary system: pelvis, genitals and breasts$F$11-20	diseases of the genitourinary system: pelvis, genitals and breasts	1.0348481700329804	{'CI': array([1.02140058, 1.04809655]), 'Gelman-Rubin': 0.9998295621266131}	Yes	1.0078749571554295	{'CI': array([0.99455339, 1.02049976]), 'Gelman-Rubin': 1.000064359596439}	No
30	Renal tubulo-interstitial diseases|diseases of the genitourinary system: urinary system$F$61-	diseases of the genitourinary system: urinary system	1.0295000549720448	{'CI': array([1.00588504, 1.05245306]), 'Gelman-Rubin': 1.0003714519002564}	Yes	1.0048717659729025	{'CI': array([0.98037815, 1.02446693]), 'Gelman-Rubin': 1.0000083614592188}	No
31	Other disorders of the musculoskeletal system and connective tissue|diseases of the musculoskeletal system and connective tissue$F$11-20	diseases of the musculoskeletal system and connective tissue	1.0128979275995804	{'CI': array([1.00141905, 1.02358226]), 'Gelman-Rubin': 0.9997930139600962}	Yes	1.0047659950983845	{'CI': array([0.99271995, 1.01558061]), 'Gelman-Rubin': 0.9999355954928562}	No
32	Systemic connective tissue disorders|diseases of the musculoskeletal system and connective tissue$M$61-	diseases of the musculoskeletal system and connective tissue	1.0425580512655792	{'CI': array([1.0037718 , 1.07649366]), 'Gelman-Rubin': 0.9999301467680514}	Yes	0.97992408849769	{'CI': array([0.95192669, 1.01177627]), 'Gelman-Rubin': 0.9998078506161527}	No
33	Other disorders of the nervous system|diseases of the nervous system$F$11-20	diseases of the nervous system	1.020055567883661	{'CI': array([1.00010229, 1.04052333]), 'Gelman-Rubin': 0.9998319057518058}	Yes	1.0078624798532756	{'CI': array([0.98838822, 1.02751079]), 'Gelman-Rubin': 0.9998805324883052}	No
34	Acute upper respiratory infections|diseases of the respiratory system$F$0-10	diseases of the respiratory system	1.0204708214285017	{'CI': array([1.01437751, 1.02631713]), 'Gelman-Rubin': 1.0000266990253894}	Yes	1.0304067562118528	{'CI': array([1.02514959, 1.03669699]), 'Gelman-Rubin': 1.0000832638761148}	Yes
35	Acute upper respiratory infections|diseases of the respiratory system$M$0-10	diseases of the respiratory system	1.0219483072715978	{'CI': array([1.01591957, 1.0276696 ]), 'Gelman-Rubin': 1.000120646919712}	Yes	1.0331341871494255	{'CI': array([1.02700963, 1.03911577]), 'Gelman-Rubin': 0.9999214638706044}	Yes
36	Chronic lower respiratory diseases|diseases of the respiratory system$M$0-10	diseases of the respiratory system	1.017861945272882	{'CI': array([1.00639244, 1.02984135]), 'Gelman-Rubin': 0.9997680222261244}	Yes	1.0304069317157638	{'CI': array([1.01976275, 1.04206113]), 'Gelman-Rubin': 0.9997815128744336}	Yes
37	Influenza and pneumonia|diseases of the respiratory system$F$0-10	diseases of the respiratory system	1.030649511081185	{'CI': array([1.0123059 , 1.04686322]), 'Gelman-Rubin': 1.0000288048216672}	Yes	1.0138722492985872	{'CI': array([0.9948835 , 1.03200405]), 'Gelman-Rubin': 0.9999674912229587}	No
38	Influenza and pneumonia|diseases of the respiratory system$M$0-10	diseases of the respiratory system	1.0179306649533408	{'CI': array([1.0020659, 1.0337375]), 'Gelman-Rubin': 0.9998999839715417}	Yes	1.0286823018629168	{'CI': array([1.0109787 , 1.04598777]), 'Gelman-Rubin': 1.000151711243703}	Yes
39	Other acute lower respiratory infections|diseases of the respiratory system$F$41-60	diseases of the respiratory system	1.0118690830343575	{'CI': array([1.00085855, 1.02334389]), 'Gelman-Rubin': 0.9998351034559984}	Yes	0.9851904755877032	{'CI': array([0.97446518, 0.99540529]), 'Gelman-Rubin': 0.999968161517293}	Yes
40	Other acute lower respiratory infections|diseases of the respiratory system$F$61-	diseases of the respiratory system	1.021506520943921	{'CI': array([1.00627417, 1.03746002]), 'Gelman-Rubin': 0.9999136542205028}	Yes	0.9578818659217628	{'CI': array([0.94216623, 0.97375211]), 'Gelman-Rubin': 1.0000125248169158}	Yes
41	Other diseases of the respiratory system|diseases of the respiratory system$F$61-	diseases of the respiratory system	1.0177190750518579	{'CI': array([1.006027 , 1.02986484]), 'Gelman-Rubin': 0.999757029591492}	Yes	0.9948907419491267	{'CI': array([0.98347205, 1.00738421]), 'Gelman-Rubin': 0.9999460011842622}	No
42	Other diseases of the respiratory system|diseases of the respiratory system$M$61-	diseases of the respiratory system	1.0157131111971878	{'CI': array([1.00377355, 1.02802195]), 'Gelman-Rubin': 0.9999691051731782}	Yes	0.9878256394248894	{'CI': array([0.97585216, 0.99914525]), 'Gelman-Rubin': 0.9998388464459258}	Yes
43	Bullous disorders|diseases of the skin and subcutaneous tissue$F$61-	diseases of the skin and subcutaneous tissue	1.0347509740473513	{'CI': array([1.0003125 , 1.06986219]), 'Gelman-Rubin': 0.9998423469961331}	Yes	0.9552205744057792	{'CI': array([0.92633905, 0.98787217]), 'Gelman-Rubin': 1.0000458718975547}	Yes
44	Bullous disorders|diseases of the skin and subcutaneous tissue$M$61-	diseases of the skin and subcutaneous tissue	1.0393962383633604	{'CI': array([1.00030029, 1.07828326]), 'Gelman-Rubin': 1.0000377202507136}	Yes	0.964227668314187	{'CI': array([0.93033321, 0.99876475]), 'Gelman-Rubin': 0.9999448616906583}	Yes
45	Disorders of skin appendages|diseases of the skin and subcutaneous tissue$F$11-20	diseases of the skin and subcutaneous tissue	1.064864240239715	{'CI': array([1.05254024, 1.07781328]), 'Gelman-Rubin': 0.9998840209992458}	Yes	1.005596565235448	{'CI': array([0.99284192, 1.01838049]), 'Gelman-Rubin': 0.9999435445340535}	No
46	Disorders of skin appendages|diseases of the skin and subcutaneous tissue$M$11-20	diseases of the skin and subcutaneous tissue	1.046109356115447	{'CI': array([1.03358932, 1.05937886]), 'Gelman-Rubin': 0.9999422357173356}	Yes	0.999952065981858	{'CI': array([0.98759521, 1.01289808]), 'Gelman-Rubin': 0.9999611715471042}	No
47	Other disorders of the skin and subcutaneous tissue|diseases of the skin and subcutaneous tissue$F$11-20	diseases of the skin and subcutaneous tissue	1.0385686353707493	{'CI': array([1.01368895, 1.06650866]), 'Gelman-Rubin': 0.9999222983501802}	Yes	1.0121002368924428	{'CI': array([0.98666523, 1.04092949]), 'Gelman-Rubin': 0.9998127935573083}	No
48	Diabetes mellitus|endocrine diseases$F$41-60	endocrine diseases	1.0115077137037434	{'CI': array([1.0053395 , 1.01730218]), 'Gelman-Rubin': 0.9999162042068719}	Yes	0.9904322856239643	{'CI': array([0.98518837, 0.99583091]), 'Gelman-Rubin': 0.9999290351281028}	Yes
49	Diabetes mellitus|endocrine diseases$M$41-60	endocrine diseases	1.0122958352259723	{'CI': array([1.00688986, 1.01822994]), 'Gelman-Rubin': 0.9997721840155293}	Yes	0.9853529967739222	{'CI': array([0.97976554, 0.99079717]), 'Gelman-Rubin': 0.9998161551299748}	Yes
50	Gonads / estrogen, androgens, testosterone, etc.|endocrine diseases$F$11-20	endocrine diseases	1.0490433933193952	{'CI': array([1.00494416, 1.09845866]), 'Gelman-Rubin': 1.000015583333865}	Yes	1.014614221796054	{'CI': array([0.97097737, 1.05696097]), 'Gelman-Rubin': 0.9998656287498234}	No
51	Thyroid gland / thyroid hormone|endocrine diseases$F$11-20	endocrine diseases	1.0572863212532666	{'CI': array([1.02748509, 1.08615646]), 'Gelman-Rubin': 0.9997901415717805}	Yes	1.0186403095918553	{'CI': array([0.99160832, 1.04618394]), 'Gelman-Rubin': 0.9998144920200246}	No
52	Thyroid gland / thyroid hormone|endocrine diseases$F$41-60	endocrine diseases	1.0137946060458682	{'CI': array([1.00755675, 1.01993197]), 'Gelman-Rubin': 1.0002136765402403}	Yes	1.0077947913467913	{'CI': array([1.00147736, 1.01417464]), 'Gelman-Rubin': 0.9999091820931564}	Yes
53	Accidents|external causes of morbidity and mortality$M$11-20	external causes of morbidity and mortality	1.0510763037710644	{'CI': array([1.02149711, 1.0824871 ]), 'Gelman-Rubin': 0.9998045783181039}	Yes	0.9868469243354214	{'CI': array([0.9607078 , 1.01290166]), 'Gelman-Rubin': 0.9998683270908387}	No
54	Persons encountering health services for examination and investigation|external causes of morbidity and mortality$F$11-20	external causes of morbidity and mortality	1.058673658355988	{'CI': array([1.05056845, 1.06739991]), 'Gelman-Rubin': 0.9997948020820341}	Yes	1.0491188421005513	{'CI': array([1.04076434, 1.05778225]), 'Gelman-Rubin': 0.9999759361703545}	Yes
55	Persons encountering health services in circumstances related to reproduction|external causes of morbidity and mortality$F$11-20	external causes of morbidity and mortality	1.040172891615577	{'CI': array([1.02754597, 1.05468077]), 'Gelman-Rubin': 0.9998262042575486}	Yes	0.9988065235326878	{'CI': array([0.98600691, 1.01364897]), 'Gelman-Rubin': 1.0000127709370565}	No
56	Persons with potential health hazards related to communicable diseases|external causes of morbidity and mortality$F$11-20	external causes of morbidity and mortality	1.0221879566133645	{'CI': array([1.00981145, 1.03440085]), 'Gelman-Rubin': 0.9997710022871418}	Yes	1.0890099084492784	{'CI': array([1.08054759, 1.09765735]), 'Gelman-Rubin': 0.9998360308926914}	Yes
57	Persons with potential health hazards related to family and personal history and certain conditions influencing health status|external causes of morbidity and mortality$F$11-20	external causes of morbidity and mortality	1.0259199266245418	{'CI': array([1.004762 , 1.04781583]), 'Gelman-Rubin': 1.0000002085056223}	Yes	1.0060514019742222	{'CI': array([0.98703668, 1.02727512]), 'Gelman-Rubin': 0.9997658815940678}	No
58	Persons with potential health hazards related to family and personal history and certain conditions influencing health status|external causes of morbidity and mortality$M$11-20	external causes of morbidity and mortality	1.026780401379115	{'CI': array([1.00413736, 1.04783358]), 'Gelman-Rubin': 0.9997572685956595}	Yes	1.0041571910943778	{'CI': array([0.9834963 , 1.02665052]), 'Gelman-Rubin': 0.9997573067292899}	No
59	Supplementary factors related to causes of morbidity and mortality classified elsewhere|external causes of morbidity and mortality$M$11-20	external causes of morbidity and mortality	1.0410646075439507	{'CI': array([1.00583315, 1.07467293]), 'Gelman-Rubin': 0.9999034220377823}	Yes	0.9663733468588968	{'CI': array([0.93428638, 0.99491653]), 'Gelman-Rubin': 0.999768568352691}	Yes
60	Mycoses|infections caused by fungi, protozoans, worms, and infestations$F$41-60	infections caused by fungi, protozoans, worms, and infestations	1.0166324256162953	{'CI': array([1.00186014, 1.03219733]), 'Gelman-Rubin': 0.999812803334157}	Yes	0.9784673973504424	{'CI': array([0.96523908, 0.99284373]), 'Gelman-Rubin': 0.999803654949661}	Yes
61	Mycoses|infections caused by fungi, protozoans, worms, and infestations$F$61-	infections caused by fungi, protozoans, worms, and infestations	1.0312734385180635	{'CI': array([1.01835117, 1.04585574]), 'Gelman-Rubin': 0.9998436753166318}	Yes	0.9498258405108654	{'CI': array([0.9379732 , 0.96182575]), 'Gelman-Rubin': 0.9999451425648733}	Yes
62	Ankle and foot|injury$M$11-20	injury	1.0227457724704423	{'CI': array([1.0069383 , 1.04011252]), 'Gelman-Rubin': 0.9997698942826947}	Yes	1.0001596027439428	{'CI': array([0.98471244, 1.01627826]), 'Gelman-Rubin': 0.9999121429046379}	No
63	Elbow and forearm|injury$M$11-20	injury	1.022961449803019	{'CI': array([1.00274593, 1.04052826]), 'Gelman-Rubin': 0.9998497465651418}	Yes	1.0009107603010243	{'CI': array([0.98207813, 1.01994131]), 'Gelman-Rubin': 1.0005667847322188}	No
64	Behavioural and emotional disorders with onset usually occurring in childhood and adolescence|mental and behavioural disorders$F$11-20	mental and behavioural disorders	1.029174090046485	{'CI': array([1.01511126, 1.04490109]), 'Gelman-Rubin': 0.9999054178597695}	Yes	1.0182753474988036	{'CI': array([1.00292092, 1.03461376]), 'Gelman-Rubin': 0.999892741859701}	Yes
65	Behavioural and emotional disorders with onset usually occurring in childhood and adolescence|mental and behavioural disorders$M$0-10	mental and behavioural disorders	1.0185750621304217	{'CI': array([1.00612022, 1.03081441]), 'Gelman-Rubin': 1.0001647051818094}	Yes	1.0090276700423957	{'CI': array([0.99736363, 1.02135755]), 'Gelman-Rubin': 0.9998657829764537}	No
66	Behavioural and emotional disorders with onset usually occurring in childhood and adolescence|mental and behavioural disorders$M$11-20	mental and behavioural disorders	1.0268740645572632	{'CI': array([1.01652451, 1.0384306 ]), 'Gelman-Rubin': 0.9997749896808987}	Yes	1.0157242876727344	{'CI': array([1.00532998, 1.02679913]), 'Gelman-Rubin': 1.0000546503624765}	Yes
67	Neurotic, stress-related and somatoform disorders|mental and behavioural disorders$M$11-20	mental and behavioural disorders	1.0152271281657392	{'CI': array([1.00386358, 1.02614477]), 'Gelman-Rubin': 0.9999437806194368}	Yes	1.0057841264366214	{'CI': array([0.99448477, 1.01770911]), 'Gelman-Rubin': 0.9999184765536169}	No
68	Neurotic, stress-related and somatoform disorders|mental and behavioural disorders$M$61-	mental and behavioural disorders	1.0197836595924243	{'CI': array([1.00039264, 1.0376288 ]), 'Gelman-Rubin': 1.0000697973641222}	Yes	0.98822291783689	{'CI': array([0.97187263, 1.00402519]), 'Gelman-Rubin': 0.9998714832637611}	No
69	Combinations|metabolic diseases$M$11-20	metabolic diseases	1.051353933409468	{'CI': array([1.00771085, 1.09527093]), 'Gelman-Rubin': 0.9998141859019695}	Yes	1.0287540217830355	{'CI': array([0.98730484, 1.06932626]), 'Gelman-Rubin': 0.9997652599958771}	No
70	Benign neoplasms|neoplasms$F$11-20	neoplasms	1.0651786481315506	{'CI': array([1.03981502, 1.09491329]), 'Gelman-Rubin': 0.9998201131198873}	Yes	1.0220311199279912	{'CI': array([0.99514261, 1.04896494]), 'Gelman-Rubin': 0.9999480629788563}	No
71	Benign neoplasms|neoplasms$M$11-20	neoplasms	1.044599055382256	{'CI': array([1.01442772, 1.07381153]), 'Gelman-Rubin': 0.9997610275222848}	Yes	1.0292247068957638	{'CI': array([1.00036875, 1.0598104 ]), 'Gelman-Rubin': 0.999913496575285}	Yes
72	Other nutritional deficiencies|nutritional diseases$M$41-60	nutritional diseases	1.021443981899308	{'CI': array([1.00252866, 1.04232237]), 'Gelman-Rubin': 1.000011181243518}	Yes	1.0008692249573534	{'CI': array([0.98281161, 1.01859367]), 'Gelman-Rubin': 0.9999752323330209}	No
73	Maternal care related to the fetus and amniotic cavity and possible delivery problems|pregnancy, childbirth and the puerperium$F$41-60	pregnancy, childbirth and the puerperium	1.0358812318740058	{'CI': array([1.00379581, 1.07538676]), 'Gelman-Rubin': 1.0003314342105303}	Yes	0.9962375195431992	{'CI': array([0.96333193, 1.03118189]), 'Gelman-Rubin': 0.9999444807544332}	No
74	Bacterial, viral and other infectious agents|sequelae, and diseases classified elsewhere$F$0-10	sequelae, and diseases classified elsewhere	1.0257364283536623	{'CI': array([1.00828582, 1.04122571]), 'Gelman-Rubin': 0.9998729003893086}	Yes	1.0227949667163911	{'CI': array([1.00587929, 1.04144266]), 'Gelman-Rubin': 0.9997989860839038}	Yes
75	Bacterial, viral and other infectious agents|sequelae, and diseases classified elsewhere$M$0-10	sequelae, and diseases classified elsewhere	1.030700792482098	{'CI': array([1.01437109, 1.047709 ]), 'Gelman-Rubin': 0.9998845904313423}	Yes	1.0221255926305879	{'CI': array([1.0059677, 1.0391156]), 'Gelman-Rubin': 0.999890629640105}	Yes
76	Circulatory and respiratory systems|symptoms and signs$F$0-10	symptoms and signs	1.0262856187869265	{'CI': array([1.01499583, 1.03714769]), 'Gelman-Rubin': 0.9998504664004506}	Yes	1.0259120201669625	{'CI': array([1.01534858, 1.03710006]), 'Gelman-Rubin': 0.9998208350130181}	Yes
77	Circulatory and respiratory systems|symptoms and signs$F$61-	symptoms and signs	1.0123133987683643	{'CI': array([1.00667623, 1.0180046 ]), 'Gelman-Rubin': 0.9998332104289853}	Yes	0.9800129535995492	{'CI': array([0.97454363, 0.9856649 ]), 'Gelman-Rubin': 0.9998749787615546}	Yes
78	Circulatory and respiratory systems|symptoms and signs$M$0-10	symptoms and signs	1.0160130679811321	{'CI': array([1.00653218, 1.02654648]), 'Gelman-Rubin': 1.000229488814787}	Yes	1.0278122649875368	{'CI': array([1.01796235, 1.03836107]), 'Gelman-Rubin': 0.9997996925369727}	Yes
79	General symptoms and signs|symptoms and signs$F$11-20	symptoms and signs	1.0134079894464976	{'CI': array([1.00286916, 1.02412447]), 'Gelman-Rubin': 0.9997913985730449}	Yes	1.003451076216045	{'CI': array([0.99227526, 1.01375063]), 'Gelman-Rubin': 0.9998415929304146}	No
80	General symptoms and signs|symptoms and signs$M$0-10	symptoms and signs	1.0114962090314636	{'CI': array([1.00220842, 1.02011526]), 'Gelman-Rubin': 0.9998389647728874}	Yes	1.014574668597415	{'CI': array([1.00477661, 1.02385522]), 'Gelman-Rubin': 0.9999965166487316}	Yes
81	Human immunodeficiency virus (hiv) disease|viral infections$M$41-60	viral infections	1.0270706446881421	{'CI': array([1.00131556, 1.05562451]), 'Gelman-Rubin': 0.9997516035008994}	Yes	0.980631020384704	{'CI': array([0.95567489, 1.00620423]), 'Gelman-Rubin': 0.9997913016372391}	No
